# Supplementary material for: Peripapillary and parafoveal vascular network assessment by optical coherence tomography angiography in aquaporin-4 antibody-positive neuromyelitis optica spectrum disorders
Source: PubMed Central journal article supplement — Br J Ophthalmol. 2018 Jul 18;103(6):789–96. doi: 10.1136/bjophthalmol-2018-312231 (PMC6582722; doi:10.1136/bjophthalmol-2018-312231), 2018-07-18
Supplement: bjophthalmol-2018-312231supp001.pdf [file bjophthalmol-2018-312231supp001.pdf]

Supplementary material 1. The basic ophthalmic assessments of NMOSD+ON, NMOSD-ON, and healthy control groups

|                                          | NMOSD+ON                     | NMOSD-ON                      | Healthy controls              | P among three groups |
|------------------------------------------|------------------------------|-------------------------------|-------------------------------|----------------------|
| Age (years, mean±SD)                     | 43.3±12.1(n=33)              | 39.5±13.7(n=34)               | 43.2 ±11.3(n=33)              | 0.366                |
| MAP (mmHg, mean±SD)                      | 82.7±9.6(n=33)               | 83.7±8.6(n=34)                | 84.5±10.8(n=33)               | 0.748                |
| MOPP(mmHg, mean±SD)                      | 41.6±7.3(n=52)               | 41.4±6.3(n=56)                | 41.6±7.3(n=66)                | 0.356                |
| IOP(mmHg, mean±SD)                       | 15.1± 2.6(n=52)              | 14.3± 2.8(n=56)               | 14.8± 2.5(n=66)               | 0.290                |
| AL(mm, mean±SD)                          | 23.5± 1.2(n=52)              | 23.8± 1.4(n=56)               | 23.5± 1.0(n=66)               | 0.244                |
| Refraction error<br>(mean±SD, range)     | -0.7±1.7(-8.0~2.0)<br>(n=52) | -1.3±2.5(-8.0~1.75)<br>(n=56) | -0.7±1.3(-4.5~1.25)<br>(n=66) | 0.155                |
| Number of ON episodes<br>(median, range) | 2(1-4) (n=52)                | -                             | -                             | -                    |
| BCVA (range)                             | NLP-20/20(n=52)              | 20/25-20/20(n=56)             | 20/32-20/16(n=66)             | <0.001               |

NMOSD, neuromyelitis optica spectrum disorders; ON, optic neuritis; SD, standard deviation; MAP, mean artery pressure; MOPP, mean ocular perfusion pressure; IOP, intraocular pressure; AL, axial length; BCVA, best corrected visual acuity; NLP, no light perception.
